# Supplementary material for: Comparative Genomic Analysis of Shrimp-Pathogenic Vibrio parahaemolyticus LC and Intraspecific Strains with Emphasis on Virulent Factors of Mobile Genetic Elements
Source: MDPI journal article supplement (doi:10.3390/microorganisms11112752), 2023-11-11
Supplement: s1 [file s1]

**Table S2 The potential virulence factors of *Vibrio parahaemolyticus* LC retrieved from VFDB database**

| VF classes                      | Virulence factors                  | Predicted genes                                             | Gene loci                                              | No. of genes |
|---------------------------------|------------------------------------|-------------------------------------------------------------|--------------------------------------------------------|--------------|
| Adherence                       | MSHA type IV pilus                 | <i>mshA-mshN</i>                                            | LC_02785--98                                           | 14           |
|                                 | Type IV pilus                      | <i>pilA--pilD, pilW</i>                                     | LC_02586--89, LC_05018                                 | 5            |
| Antiphagocytosis                | Capsular polysaccharide            | <i>cpsA--cpsJ</i>                                           | LC_03830--39                                           | 10           |
|                                 |                                    | <i>wbfV, wbfY, wecA</i>                                     | LC_00247, LC_00220, LC_00246                           | 3            |
|                                 |                                    | <i>wza, wzb, wzc</i>                                        | LC_04021, LC_04022, LC_04024                           | 3            |
|                                 |                                    | <i>cheA, cheB, cheR, cheV, cheW, cheY, cheZ</i>             | LC_02208--09, LC_00761--62, LC_02205, LC_02210-11      | 7            |
|                                 |                                    | <i>flaA, flaB, flaD, flaE, flaG, flal</i>                   | LC_02222, LC_02234, LC_02236--39,                      | 6            |
| Chemotaxis and motility         | Flagella                           | <i>flgA--flgN</i>                                           | LC_00758--60, LC_00763--67, LC_00769--73               | 13           |
|                                 |                                    | <i>flhA, flhB, flhF, flhG</i>                               | LC_02213--16                                           | 4            |
|                                 |                                    | <i>fliA, fliD--fliN, fliO--fliS</i>                         | LC_02212, LC_02217--30, LC_02235, LC_02237             | 17           |
|                                 |                                    | <i>flrA--flrC, motA-motB, motX--motY</i>                    | LC_02231--33, LC_00659--60, LC_02109, LC_02897         | 7            |
|                                 |                                    |                                                             |                                                        |              |
|                                 |                                    |                                                             |                                                        |              |
| Iron uptake                     | Enterobactin receptors             | <i>irgA, vctA</i>                                           | LC_02673, LC_04796                                     | 2            |
|                                 | Heme receptors                     | <i>hutA, hutR</i>                                           | LC_03355, LC_03893                                     | 2            |
|                                 | ABC transport                      | <i>vctC, vctD, vctG, vctP</i>                               | LC_04789-92                                            | 4            |
| Quorum sensing                  | Autoinducer-2                      | <i>luxS</i>                                                 | LC_02600                                               | 1            |
|                                 | Cholerae autoinducer-1             | <i>cqsA</i>                                                 | LC_04842                                               | 1            |
| Secretion system                | EPS type II secretion system       | <i>epsC, epsE--epsN, gspD</i>                               | LC_00125--36                                           | 12           |
|                                 | T3SS1 secreted effectors           | <i>vopQ, vopR, vopS</i>                                     | LC_01666, LC_01668, LC_01670                           | 3            |
|                                 | T3SS1                              | <i>sycN, tyeA, vcrD, vcrG, vcrH, vcrR, vcrV</i>             | LC_01651--52, LC_01644--48                             | 7            |
|                                 |                                    | <i>virF, virG, vopB, vopD, vopN, vxsC</i>                   | LC_01684--86, LC_01642--43, LC_01653                   | 6            |
|                                 |                                    | <i>vscA--vscD, vscF--vscL, vscN, vscO--vscU, vscX--vscY</i> | LC_01680--83, LC_01672--78, LC_01654--61, LC_01649--50 | 21           |
|                                 |                                    |                                                             |                                                        |              |
| Toxin                           | Thermolabile hemolysin             | <i>tlh</i>                                                  | LC_04391                                               | 1            |
| Colonization and Immune evasion | Capsule biosynthesis and transport | <i>kpsF</i>                                                 | LC_00245                                               | 1            |
