# Supplementary material for: Comparative Genomic Analysis of Shrimp-Pathogenic Vibrio parahaemolyticus LC and Intraspecific Strains with Emphasis on Virulent Factors of Mobile Genetic Elements
Source: Microorganisms. 2023 Nov 11;11(11):2752. doi: 10.3390/microorganisms11112752 (PMC10672994; doi:10.3390/microorganisms11112752)
Supplement: Supplementary file 1 [file microorganisms-11-02752-s001.zip]

Archive with 5 entries (5 files):
- Table S1.pdf
- Table S2.pdf
- Table S3.xlsx
- Table S4.xlsx
- Table S5.xlsx
