# Supplementary material for: Comparative Genomic Analysis of Shrimp-Pathogenic Vibrio parahaemolyticus LC and Intraspecific Strains with Emphasis on Virulent Factors of Mobile Genetic Elements
Source: Microorganisms. 2023 Nov 11;11(11):2752. doi: 10.3390/microorganisms11112752 (PMC10672994; doi:10.3390/microorganisms11112752)
Supplement: Supplementary file 1 [file microorganisms-11-02752-s001.zip › Table S3.xlsx]

## Sheet: Table S3
Table S3 Gene contents of GI-5 of Virbrio parahaemolyticus LC with homologs of other six intraspecific strains
	Strain LC					Strain 2210633					Strain S01					Strain 02-3					Strain 12-1					Strain 01-1					Strain 08-1
	Gene locus	Colour	Gene classification	Gene annotation		Gene locus	Colour	Gene classification	Gene annotation		Gene locus	Colour	Gene classification	Gene annotation		Gene locus	Colour	Gene classification	Gene annotation		Gene locus	Colour	Gene classification	Gene annotation		Gene locus	Colour	Gene classification	Gene annotation		Gene locus	Colour	Gene classification	Gene annotation
	LC_01766	blue	Integrase	Integrase core domain/IS481 family transposase ISVvu4		RIMD_01744	blue	transposase	IS3 family transposase ISVpa2		S01_01216	blue	Integrase/Transposase	Tyrosine recombinase XerD		02-3_01246	blue	Integrase/Transposase	Tyrosine recombinase XerD		12-1_01246	blue	Integrase/Transposase	Tyrosine recombinase XerD		01-1_01275	blue	Integrase/Transposase	Tyrosine recombinase XerD		08-1_01256	blue	Integrase/Transposase	Tyrosine recombinase XerD
	LC_01767	orange	Acetyltransferase domain/family	Acetyltransferase (GNAT) family		RIMD_01745	blue	transposase	IS3 family transposase ISVpa2		S01_01217	green	functional gene	opioid growth factor receptor-related protein		02-3_01247	green	functional gene	opioid growth factor receptor-related protein		12-1_01247	light grey	hypothetical protein	hypothetical protein		01-1_01276	light grey	hypothetical protein	hypothetical protein		08-1_01257	light grey	hypothetical protein	hypothetical protein
	LC_01768	light grey	Hypothetical protein	WP_024701711.1 hypothetical protein		RIMD_01746	green	functional gene	cold shock domain-containing protein		S01_01218	light grey	hypothetical protein	hypothetical protein		02-3_0	light grey	hypothetical protein	hypothetical protein		12-1_01248	light grey	hypothetical protein	hypothetical protein		01-1_01277	light grey	hypothetical protein	hypothetical protein		08-1_01258	light grey	hypothetical protein	hypothetical protein
	LC_01769	yellow	GH19: Enzyme/domain	Chitinase, GH19 family		RIMD_01747	green	functional gene	GFA family protein		S01_01219	red	toxicity factor	Antitoxin RelB		02-3_01249	red	toxicity factor	Antitoxin RelB		12-1_01249	light grey	hypothetical protein	hypothetical protein		01-1_01278	light grey	hypothetical protein	hypothetical protein		08-1_01259	light grey	hypothetical protein	hypothetical protein
	LC_01770	blue	Integrase	Integrase core domain/IS3 family transposase ISDpr3		RIMD_01748	light grey	Hypothetical protein	hypothetical protein		S01_01220	red	toxicity factor	type II toxin-antitoxin system RelE/ParE family toxin		02-3_01250	red	toxicity factor	type II toxin-antitoxin system RelE/ParE family toxin		12-1_01250	light grey	hypothetical protein	hypothetical protein		01-1_01279	light grey	hypothetical protein	hypothetical protein		08-1_01260	light grey	hypothetical protein	hypothetical protein
	LC_01771	yellow	Enzyme/domain	HTH-like domain		RIMD_01749	light grey	Hypothetical protein	hypothetical protein		S01_01221	yellow	Enzyme/domain	aminotransferase//aminotransferase		02-3_01251	green	functional gene	aminotransferase，nicotinamide mononucleotide transporter		12-1_01251	light grey	hypothetical protein	hypothetical protein		01-1_01280	light grey	hypothetical protein	hypothetical protein		08-1_01261	light grey	hypothetical protein	hypothetical protein
	LC_01772	blue	Transposase	Transposase		RIMD_01750	light grey	Hypothetical protein	hypothetical protein		S01_01222	light grey	hypothetical protein	hypothetical protein		02-3_01252	light grey	hypothetical protein	hypothetical protein		12-1_01252	blue	Integrase/Transposase	IS30 family transposase ISVa6		01-1_01281	green	functional gene	zinc dependent phospholipase C family protein		08-1_01262	yellow	Enzyme/domain	zinc dependent phospholipase C family protein
	LC_01773	red	toxicity factor	addiction module toxin, Txe/YoeB family		RIMD_01751	orange	Acetyltransferase domain/family	dTDP-fucosamine acetyltransferase		S01_01223	green	functional gene	tRNA-Pyl		02-3_01253	green	functional gene	tRNA-Pyl		12-1_01253	yellow	Enzyme/domain	HNH endonuclease		01-1_01282	light grey	hypothetical protein	hypothetical protein		08-1_01263	light grey	hypothetical protein	hypothetical protein
	LC_01774	red	toxicity factor	prevent-host-death family protein/Antitoxin YefM		RIMD_01752	light grey	Hypothetical protein	hypothetical protein		S01_01224	light grey	hypothetical protein	hypothetical protein		02-3_01254	light grey	hypothetical protein	hypothetical protein		12-1_01254	blue	Integrase/Transposase	IS30 family transposase ISVa6		01-1_01283	yellow	Enzyme/domain	Shikimate kinase		08-1_01264	yellow	Enzyme/domain	Shikimate kinase
	LC_01775	light grey	Hypothetical protein	WP_005464625.1 MULTISPECIES: hypothetical protein		RIMD_01753	yellow	Enzyme/domain	2-iminobutanoate/2-iminopropanoate deaminase		S01_01225	light grey	hypothetical protein	hypothetical protein		02-3_01255	light grey	hypothetical protein	hypothetical protein		12-1_01255	green	functional gene	PanD regulatory factor		01-1_01284	light grey	hypothetical protein	hypothetical protein		08-1_01265	light grey	hypothetical protein	hypothetical protein
	LC_01776	blue	Transposase	Transposase/IS3 family transposase ISSham2		RIMD_01754	green	functional gene	VOC family protein		S01_01226	light grey	hypothetical protein	hypothetical protein		02-3_01256	light grey	hypothetical protein	hypothetical protein		12-1_01256	green	functional gene	energy transducer TonB		01-1_01285	red	toxicity factor	Antitoxin RelB		08-1_01266	blue	Integrase/Transposase	IS30 family transposase ISVa6
	LC_01777	blue	Integrase	Integrase core domain		RIMD_01755	light grey	Hypothetical protein	hypothetical protein		S01_01227	light grey	hypothetical protein	DUF4440 domain-containing protein		02-3_01257	light grey	hypothetical protein	DUF4440 domain-containing protein		12-1_01257	green	functional gene	energy transducer TonB		01-1_01286	red	toxicity factor	type II toxin-antitoxin system RelE/ParE family toxin		08-1_01267	red	toxicity factor	Antitoxin RelB
	LC_01778	orange	Acetyltransferase domain/family	Acetyltransferase (GNAT) domain		RIMD_01756	light grey	Hypothetical protein	hypothetical protein		S01_01228	light grey	hypothetical protein	hypothetical protein		02-3_01258	light grey	hypothetical protein	hypothetical protein		12-1_01258	green	functional gene	NERD domain-containing protein		01-1_01287	light grey	hypothetical protein	hypothetical protein		08-1_01268	red	toxicity factor	type II toxin-antitoxin system RelE/ParE family toxin
	LC_01779	light grey	Hypothetical protein	WP_062852532.1 hypothetical protein		RIMD_01757	green	functional gene	nuclear transport factor 2 family protein		S01_01229	green	functional gene	VOC family protein		02-3_01259	green	functional gene	VOC family protein		12-1_01259	green	functional gene	pentapeptide repeat-containing protein		01-1_01288	light grey	hypothetical protein	hypothetical protein		08-1_01269	light grey	hypothetical protein	hypothetical protein
	LC_01780	light grey	Hypothetical protein	WP_024699549.1 hypothetical protein		RIMD_01758	light grey	Hypothetical protein	hypothetical protein		S01_01230	yellow	Enzyme/domain	CTP pyrophosphohydrolase		02-3_01260	yellow	Enzyme/domain	CTP pyrophosphohydrolase		12-1_01260	light grey	hypothetical protein	hypothetical protein		01-1_01289	light grey	hypothetical protein	hypothetical protein		08-1_01270	light grey	hypothetical protein	hypothetical protein
	LC_01781	light grey	Hypothetical protein	WP_017634126.1 MULTISPECIES: hypothetical protein		RIMD_01759	yellow	Enzyme/domain	antibiotic biosynthesis monooxygenase		S01_01231	green	functional gene	MazG-related protein		02-3_01261	green	functional gene	MazG-related protein		12-1_01261	orange	Acetyltransferase domain/family	GNAT family N-acetyltransferase		01-1_01290	orange	Acetyltransferase domain/family	GNAT family N-acetyltransferase		08-1_01271	light grey	hypothetical protein	hypothetical protein
	LC_01782	light grey	Hypothetical protein	WP_017634127.1 MULTISPECIES: hypothetical protein		RIMD_01760	green	functional gene	putative chaperone CsaA		S01_01232	light grey	hypothetical protein	hypothetical protein		02-3_01262	light grey	hypothetical protein	hypothetical protein		12-1_01262	orange	Acetyltransferase domain/family	GNAT family N-acetyltransferase		01-1_01291	orange	Acetyltransferase domain/family	putative N-acetyltransferase YafP		08-1_01272	orange	Acetyltransferase domain/family	GNAT family N-acetyltransferase
	LC_01783	yellow	Enzyme/domain	FRG domain		RIMD_01761	green	functional gene	Protein YhfA		S01_01233	light grey	hypothetical protein	hypothetical protein		02-3_01263	light grey	hypothetical protein	hypothetical protein		12-1_01263	light grey	hypothetical protein	hypothetical protein		01-1_01292	light grey	hypothetical protein	hypothetical protein		08-1_01273	orange	Acetyltransferase domain/family	putative N-acetyltransferase YafP
	LC_01784	orange	Acetyltransferase domain/family	Acetyltransferase (GNAT) domain		RIMD_01762	green	functional gene	tetratricopeptide repeat protein		S01_01234	green	functional gene	nucleotidyltransferase family protein		02-3_01264	yellow	Enzyme/domain	nucleotidyltransferase family protein		12-1_01264	green	functional gene	transglutaminase-like domain-containing protein		01-1_01293	light grey	hypothetical protein	hypothetical protein		08-1_01274	light grey	hypothetical protein	hypothetical protein
	LC_01785	light grey	Hypothetical protein	WP_140174035.1 hypothetical protein		RIMD_01763	green	functional gene	toll/interleukin-1 receptor domain-containing protein		S01_01235	light grey	hypothetical protein	hypothetical protein		02-3_01265	light grey	hypothetical protein	hypothetical protein		12-1_01265	green	functional gene	Cell division coordinator CpoB		01-1_01294	light grey	hypothetical protein	hypothetical protein		08-1_01275	light grey	hypothetical protein	hypothetical protein
	LC_01786	orange	Acetyltransferase domain/family	Acetyltransferase (GNAT) family		RIMD_01764	light grey	Hypothetical protein	hypothetical protein		S01_01236	light grey	hypothetical protein	hypothetical protein		02-3_01266	light grey	hypothetical protein	hypothetical protein		12-1_01266	light grey	hypothetical protein	hypothetical protein		01-1_01295	light grey	hypothetical protein	hypothetical protein		08-1_01276	light grey	hypothetical protein	hypothetical protein
	LC_01787	light grey	Hypothetical protein	WP_042766318.1 hypothetical protein		RIMD_01765	light grey	Hypothetical protein	hypothetical protein		S01_01237	light grey	hypothetical protein	hypothetical protein		02-3_01267	light grey	hypothetical protein	hypothetical protein		12-1_01267	yellow	Enzyme/domain	Phosphoglycolate phosphatase		01-1_01296	green	functional gene	GFA family protein		08-1_01277	light grey	hypothetical protein	hypothetical protein
	LC_01788	light grey	Hypothetical protein	WP_062852340.1 hypothetical protein		RIMD_01766	green	functional gene	Protein hit		S01_01238	green	functional gene	Homoserine/homoserine lactone efflux protein		02-3_01268	green	functional gene	Homoserine/homoserine lactone efflux protein		12-1_01268	green	functional gene	NYN domain-containing protein		01-1_01297	yellow	Enzyme/domain	DUF4145 domain-containing protein		08-1_01278	green	functional gene	GFA family protein
	LC_01789	light grey	Hypothetical protein	WP_062852341.1 hypothetical protein		RIMD_01767	light grey	Hypothetical protein	hypothetical protein		S01_01239	orange	Acetyltransferase domain/family	Acetyltransferase		02-3_01269	orange	Acetyltransferase domain/family	Acetyltransferase		12-1_01269	yellow	Enzyme/domain	serine protease		01-1_01298	light grey	hypothetical protein	hypothetical protein		08-1_01279	light grey	hypothetical protein	DUF4145 domain-containing protein
	LC_01790	light grey	Hypothetical protein	WP_062852342.1 hypothetical protein		RIMD_01768	green	functional gene	energy transducer TonB		S01_01240	light grey	hypothetical protein	hypothetical protein		02-3_01270	light grey	hypothetical protein	hypothetical protein		12-1_01270	light grey	hypothetical protein	hypothetical protein		01-1_01299	light grey	hypothetical protein	hypothetical protein		08-1_01280	light grey	hypothetical protein	hypothetical protein
	LC_01791	yellow	Enzyme/domain	Trypsin		RIMD_01769	red	toxicity factor	Toxin YoeB		S01_01241	light grey	hypothetical protein	hypothetical protein		02-3_01271	light grey	hypothetical protein	hypothetical protein		12-1_01271	orange	Acetyltransferase domain/family	Acetyltransferase		01-1_01300	light grey	hypothetical protein	hypothetical protein		08-1_01281	light grey	hypothetical protein	hypothetical protein
	LC_01792	orange	Acetyltransferase domain/family	Acetyltransferase (GNAT) domain		RIMD_01770	red	toxicity factor	Antitoxin YefM		S01_01242	green	functional gene	cold-shock containing protein		02-3_01272	green	functional gene	cold shock domain-containing protein		12-1_01272	orange	Acetyltransferase domain/family	GNAT family N-acetyltransferase		01-1_01301	light grey	hypothetical protein	hypothetical protein		08-1_01282	light grey	hypothetical protein	hypothetical protein
	LC_01793	yellow	Enzyme/domain	Domain of unknown function (DUF4336)		RIMD_01771	light grey	hypothetical protein	hypothetical protein		S01_01243	light grey	hypothetical protein	hypothetical protein		02-3_01273	light grey	hypothetical protein	hypothetical protein		12-1_01273	light grey	hypothetical protein	hypothetical protein		01-1_01302	light grey	hypothetical protein	hypothetical protein		08-1_01283	light grey	hypothetical protein	hypothetical protein
	LC_01794	light grey	Hypothetical protein	WP_029826694.1 hypothetical protein		RIMD_01772	light grey	Hypothetical protein	hypothetical protein		S01_01244	green	functional gene	tetratricopeptide repeat protein		02-3_01274	green	functional gene	tetratricopeptide repeat protein		12-1_01274	light grey	hypothetical protein	hypothetical protein		01-1_01303	light grey	hypothetical protein	hypothetical protein		08-1_01284	light grey	hypothetical protein	hypothetical protein
	LC_01795	light grey	Hypothetical protein	hypothetical protein		RIMD_01773	green	functional gene	CBS domain-containing protein		S01_01245	orange	Acetyltransferase domain/family	GNAT family N-acetyltransferase		02-3_01275	orange	Acetyltransferase domain/family	GNAT family N-acetyltransferase		12-1_01275	orange	Acetyltransferase domain/family	GNAT family N-acetyltransferase		01-1_01304	yellow	Enzyme/domain	RNA pyrophosphohydrolase		08-1_01285	light grey	hypothetical protein	hypothetical protein
	LC_01796	yellow	Enzyme/domain	DUF218 domain//(DUF:domain of unknown function)		RIMD_01774	yellow	Enzyme/domain	Cardiolipin synthase		S01_01246	light grey	hypothetical protein	hypothetical protein		02-3_01276	light grey	hypothetical protein	hypothetical protein		12-1_01276	light grey	hypothetical protein	hypothetical protein		01-1_01305	light grey	hypothetical protein	hypothetical protein		08-1_01286	blue	Integrase/Transposase	IS30 family transposase ISVa6
	LC_01797	green	functional genes	OsmC-like protein,defense against oxidative stress caused by exposure to organic hydroperoxides		RIMD_01775	orange	Acetyltransferase domain/family	Mycothiol acetyltransferase		S01_01247	yellow	Enzyme/domain	RNA pyrophosphohydrolase		02-3_01277	yellow	Enzyme/domain	RNA pyrophosphohydrolase		12-1_01277	yellow	Enzyme/domain	AAA family ATPase		01-1_01306	light grey	hypothetical protein	hypothetical protein		08-1_01287	yellow	Enzyme/domain	RNA pyrophosphohydrolase
	LC_01798	light grey	Hypothetical protein	WP_080996695.1 MULTISPECIES: hypothetical protein		RIMD_01776	yellow	Enzyme/domain	aminotransferase、PnuC protein		S01_01248	green	functional gene	cold shock domain-containing protein		02-3_01278	green	functional gene	cold shock domain-containing protein		12-1_01278	orange	Acetyltransferase domain/family	GNAT family N-acetyltransferase		01-1_01307	yellow	Enzyme/domain	Shikimate kinase		08-1_01288	light grey	hypothetical protein	hypothetical protein
	LC_01799	yellow	Enzyme/domain	MazG nucleotide pyrophosphohydrolase domain//oxidative stress response		RIMD_01777	red	toxicity factor	type II toxin-antitoxin system RelB/DinJ family antitoxin		S01_01249	light grey	hypothetical protein	hypothetical protein		02-3_01279	blue	Integrase/Transposase	IS5 family transposase ISVa2		12-1_01279	orange	Acetyltransferase domain/family	GNAT family N-acetyltransferase		01-1_01308	light grey	hypothetical protein	hypothetical protein		08-1_01289	blue	Integrase/Transposase	IS30 family transposase ISVa6
	LC_01800	light grey	Hypothetical protein	WP_062851948.1 hypothetical protein		RIMD_01778	red	toxicity factor	type II toxin-antitoxin system mRNA interferase toxin, RelE/StbE family		S01_01250	light grey	hypothetical protein	hypothetical protein		02-3_01280	light grey	hypothetical protein	hypothetical protein		12-1_01280	yellow	Enzyme/domain	Glutathione S-transferase GST-6.0		01-1_01309	yellow	Enzyme/domain	nucleotide pyrophosphohydrolase		08-1_01290	blue	Integrase/Transposase	IS30 family transposase ISVa6
	LC_01801	light grey	Hypothetical protein	WP_062851949.1 hypothetical protein		RIMD_01779	yellow	Enzyme/domain	nucleotide pyrophosphohydrolase		S01_01251	orange	Acetyltransferase domain/family	Acetyltransferase		02-3_01281	light grey	hypothetical protein	hypothetical protein		12-1_01281	green	functional gene	damage-inducible protein DinB,DinB family protein		01-1_01310	orange	Acetyltransferase domain/family	GNAT family N-acetyltransferase		08-1_01291	light grey	hypothetical protein	hypothetical protein
	LC_01802	light grey	Hypothetical protein	hypothetical protein		RIMD_01780	orange	Acetyltransferase domain/family	Acetyltransferase		S01_01252	light grey	hypothetical protein	hypothetical protein		02-3_01282	yellow	Enzyme/domain	GNAT family N-acetyltransferase		12-1_01282	green	functional gene	FRG domain-containing protein		01-1_01311	light grey	hypothetical protein	hypothetical protein		08-1_01292	yellow	Enzyme/domain	Shikimate kinase
	LC_01803	light grey	Hypothetical protein	Protein of unknown function (DUF3955)		RIMD_01781	yellow	Enzyme/domain	MazG nucleotide pyrophosphohydrolase domain protein		S01_01253	green	functional gene	SIR2 family protein		02-3_01283	light grey	hypothetical protein	hypothetical protein		12-1_01283	light grey	hypothetical protein	hypothetical protein		01-1_01312	green	functional gene	T6SS amidase immunity protein Tai4 family protein		08-1_01293	light grey	hypothetical protein	hypothetical protein
	LC_01804	light grey	Hypothetical protein	WP_062851950.1 hypothetical protein		RIMD_01782	green	functional gene	cold-shock protein		S01_01254	light grey	hypothetical protein	DUF2750 domain-containing protein		02-3_01284	green	functional gene	SIR2 family protein		12-1_01284	orange	Acetyltransferase domain/family	Mycothiol acetyltransferase		01-1_01313	yellow	Enzyme/domain	nucleotide pyrophosphohydrolase		08-1_01294	yellow	Enzyme/domain	nucleotide pyrophosphohydrolase
	LC_01805	light grey	Hypothetical protein	WP_139046885.1 hypothetical protein		RIMD_01783	light grey	Hypothetical protein	hypothetical protein		S01_01255	light grey	hypothetical protein	hypothetical protein		02-3_01285	light grey	hypothetical protein	DUF2750 domain-containing protein		12-1_01285	red	toxicity factor	Toxin ParE1		01-1_01314	light grey	hypothetical protein	hypothetical protein		08-1_01295	orange	Acetyltransferase domain/family	GNAT family N-acetyltransferase
	LC_01806	red	toxicity factor	prevent-host-death family protein/Antitoxin YefM/type II toxin-antitoxin system Phd/YefM family antitoxin		RIMD_01784	green	functional gene	ClbS/DfsB family four-helix bundle protein		S01_01256	green	functional gene	nucleotidyltransferase family protein		02-3_01286	light grey	hypothetical protein	hypothetical protein		12-1_01286	red	toxicity factor	type II toxin-antitoxin system Phd/YefM family antitoxin,prevent-host-death protein		01-1_01315	yellow	Enzyme/domain	DNA ligase		08-1_01296	blue	Integrase/Transposase	IS30 family transposase ISVa6
	LC_01807	red	toxicity factor	ParE toxin of type II toxin-antitoxin system, parDE		RIMD_01785	light grey	Hypothetical protein	hypothetical protein		S01_01257	light grey	hypothetical protein	hypothetical protein		02-3_01287	green	functional gene	nucleotidyltransferase family protein		12-1_01287	light grey	hypothetical protein	hypothetical protein		01-1_01316	light grey	hypothetical protein	hypothetical protein		08-1_01297	light grey	hypothetical protein	hypothetical protein
	LC_01808	yellow	Enzyme/domain	NUDIX domain,, Nudix proteins affecting microbial pathogenesis		RIMD_01786	light grey	Hypothetical protein	hypothetical protein		S01_01258	green	functional gene	YfbU family protein		02-3_01288	light grey	hypothetical protein	hypothetical protein		12-1_01288	light grey	hypothetical protein	hypothetical protein		01-1_01317	light grey	hypothetical protein	hypothetical protein		08-1_01298	blue	Integrase/Transposase	IS30 family transposase ISVa6
	LC_01809	yellow	Enzyme/domain	Methyltransferase domain		RIMD_01787	light grey	Hypothetical protein	hypothetical protein		S01_01259	green	functional gene	HEPN domain-containing protein， HEPN: a common domain in bacterial drug resistance and human neurodegenerative proteins		02-3_01289	green	functional gene	YfbU family protein		12-1_01289	light grey	hypothetical protein	hypothetical protein		01-1_01318	light grey	hypothetical protein	hypothetical protein		08-1_01299	green	functional gene	T6SS amidase immunity protein Tai4 family protein
	LC_01810	light grey	Hypothetical protein	WP_062851955.1 hypothetical protein		RIMD_01788	red	toxicity factor	type II toxin-antitoxin system RelB/DinJ family antitoxin/RelB protein		S01_01260	13	hypothetical protein	hypothetical protein		02-3_01290	green	functional gene	HEPN domain-containing protein		12-1_01290	light grey	hypothetical protein	hypothetical protein		01-1_01319	light grey	hypothetical protein	hypothetical protein		08-1_01300	light grey	hypothetical protein	hypothetical protein
	LC_01811	light grey	Hypothetical protein	WP_062851956.1 hypothetical protein		RIMD_01789	red	toxicity factor	type II toxin-antitoxin system mRNA interferase toxin, RelE/StbE family		S01_01261	yellow	Enzyme/domain	2-iminobutanoate/2-iminopropanoate deaminase		02-3_01291	light grey	hypothetical protein	hypothetical protein		12-1_01291	light grey	hypothetical protein	hypothetical protein		01-1_01320	blue	Integrase/Transposase	IS30 family transposase ISVa6		08-1_01301	light grey	hypothetical protein	hypothetical protein
	LC_01812	light grey	Hypothetical protein	WP_062851957.1 hypothetical protein		RIMD_01790	orange	Acetyltransferase domain/family	GNAT family N-acetyltransferase		S01_01262	light grey	hypothetical protein	hypothetical protein		02-3_01292	yellow	Enzyme/domain	2-iminobutanoate/2-iminopropanoate deaminase		12-1_01292	light grey	hypothetical protein	hypothetical protein		01-1_01321	yellow	Enzyme/domain	HNH endonuclease		08-1_01302	yellow	Enzyme/domain	DNA ligase
	LC_01813	light grey	Hypothetical protein	WP_025527349.1 hypothetical protein		RIMD_01791	light grey	Hypothetical protein	hypothetical protein		S01_01263	light grey	hypothetical protein	DUF6157 family protein		02-3_01293	light grey	hypothetical protein	hypothetical protein		12-1_01293	light grey	hypothetical protein	hypothetical protein		01-1_01322	blue	Integrase/Transposase	IS30 family transposase ISVa6		08-1_01303	light grey	hypothetical protein	hypothetical protein
	LC_01814	light grey	Hypothetical protein	WP_069544079.1 hypothetical protein		RIMD_01792	yellow	Enzyme/domain	DUF1311 domain-containing protein		S01_01264	light grey	hypothetical protein	hypothetical protein		02-3_01294	light grey	hypothetical protein	DUF6157 family protein		12-1_01294	light grey	hypothetical protein	hypothetical protein		01-1_01323	green	functional gene	PanD regulatory factor		08-1_01304	light grey	hypothetical protein	hypothetical protein
	LC_01815	light grey	Hypothetical protein	WP_021453434.1 hypothetical protein		RIMD_01793	light grey	Hypothetical protein	hypothetical protein		S01_01265	light grey	hypothetical protein	hypothetical protein		02-3_01295	light grey	hypothetical protein	hypothetical protein		12-1_01295	yellow	Enzyme/domain	putative isomerase YddE		01-1_01324	green	functional gene	energy transducer TonB		08-1_01305	blue	Integrase/Transposase	IS30 family transposase ISVa6
	LC_01816	orange	Acetyltransferase domain/family	Acetyltransferase (GNAT) domain		RIMD_01794	light grey	Hypothetical protein	hypothetical protein		S01_01266	yellow	Enzyme/domain	aminotransferase,,		02-3_01296	light grey	hypothetical protein	hypothetical protein		12-1_01296	blue	Integrase/Transposase	IS30 family transposase ISVa6		01-1_01325	blue	Integrase/Transposase	IS30 family transposase ISVa6		08-1_01306	light grey	hypothetical protein	hypothetical protein
	LC_01817	light grey	Hypothetical protein	WP_140108940.1 hypothetical protein		RIMD_01795	light grey	Hypothetical protein	hypothetical protein		S01_01267	light grey	hypothetical protein	hypothetical protein		02-3_01297	yellow	Enzyme/domain	aminotransferase		12-1_01297	orange	Acetyltransferase domain/family	GNAT family N-acetyltransferase		01-1_01326	green	functional gene	NERD domain-containing protein		08-1_01307	light grey	hypothetical protein	hypothetical protein
	LC_01818	yellow	Enzyme/domain	Glyoxalase/Bleomycin resistance protein/Dioxygenase superfamily		RIMD_01796	orange	Acetyltransferase domain/family	Acetyltransferase YpeA		S01_01268	orange	Acetyltransferase domain/family	GNAT family N-acetyltransferase		02-3_01298	light grey	hypothetical protein	hypothetical protein		12-1_01298	light grey	hypothetical protein	hypothetical protein		01-1_01327	green	functional gene	pentapeptide repeat-containing protein		08-1_01308	yellow	Enzyme/domain	HNH endonuclease
	LC_01819	yellow	Enzyme/domain	Glutathione S-transferase, N-terminal domain		RIMD_01797	green	functional gene	EcsC family protein		S01_01269	light grey	hypothetical protein	hypothetical protein		02-3_01299	orange	Acetyltransferase domain/family	GNAT family N-acetyltransferase		12-1_01299	light grey	hypothetical protein	hypothetical protein		01-1_01328	green	functional gene	Sbal_3080 family lipoprotein		08-1_01309	green	functional gene	PanD regulatory factor
	LC_01820	yellow	Enzyme/domain	Uncharacterized conserved protein, DUF2321 domain		RIMD_01798	light grey	Hypothetical protein	hypothetical protein		S01_01270	light grey	hypothetical protein	hypothetical protein		02-3_01300	light grey	hypothetical protein	hypothetical protein		12-1_01300	light grey	hypothetical protein	DUF2007 domain-containing protein		01-1_01329	light grey	hypothetical protein	hypothetical protein		08-1_01310	blue	Integrase/Transposase	IS30 family transposase ISVa6
	LC_01821	yellow	Enzyme/domain	Domain of unknown function (DUF4145)		RIMD_01799	green	functional gene	Protein hit		S01_01271	light grey	hypothetical protein	hypothetical protein		02-3_01301	light grey	hypothetical protein	hypothetical protein		12-1_01301	light grey	hypothetical protein	hypothetical protein		01-1_01330	orange	Acetyltransferase domain/family	GNAT family N-acetyltransferase		08-1_01311	green	functional gene	energy transducer TonB
	LC_01822	light grey	Hypothetical protein	WP_140357568.1 hypothetical protein		RIMD_01800	green	functional gene	TIGR02391 family protein		S01_01272	green	functional gene	type VI secretion system amidase effector protein Tae4		02-3_01302	light grey	hypothetical protein	hypothetical protein		12-1_01302	light grey	hypothetical protein	hypothetical protein		01-1_01331	orange	Acetyltransferase domain/family	GNAT family N-acetyltransferase		08-1_01312	blue	Integrase/Transposase	IS30 family transposase ISVa6
	LC_01823	light grey	Hypothetical protein	WP_077673164.1 MULTISPECIES: hypothetical protein		RIMD_01801	light grey	Hypothetical protein	hypothetical protein		S01_01273	green	functional gene	T6SS amidase immunity protein Tai4 family protein		02-3_01303	light grey	hypothetical protein	hypothetical protein		12-1_01303	orange	Acetyltransferase domain/family	Mycothiol acetyltransferase		01-1_01332	light grey	hypothetical protein	hypothetical protein		08-1_01313	orange	Acetyltransferase domain/family	GNAT family N-acetyltransferase
	LC_01824	red	toxicity factor	Type VI secretion system VasI, EvfG, VC_A0118		RIMD_01802	light grey	Hypothetical protein	hypothetical protein		S01_01274	light grey	hypothetical protein	hypothetical protein		02-3_01304	green	functional gene	T6SS amidase immunity protein Tai4 family protein		12-1_01304	light grey	hypothetical protein	hypothetical protein		01-1_01333	green	functional gene	transglutaminase-like domain-containing protein		08-1_01314	blue	Integrase/Transposase	IS5 family transposase ISVa2
	LC_01825	yellow	Enzyme/domain	Topoisomerase DNA binding C4 zinc finger		RIMD_01803	green	functional gene	ClbS/DfsB family four-helix bundle protein		S01_01275	light grey	hypothetical protein	hypothetical protein		02-3_01305	green	functional gene	type VI secretion system amidase effector protein Tae4		12-1_01305	yellow	Enzyme/domain	nucleotide pyrophosphohydrolase		01-1_01334	green	functional gene	Cell division coordinator CpoB		08-1_01315	yellow	Enzyme/domain	AAA family ATPase
	LC_01826	green	functional genes	LysE type translocator		RIMD_01804	orange	Acetyltransferase domain/family	Acetyltransferase YpeA//GNAT family N-acetyltransferase		S01_01276	light grey	hypothetical protein	hypothetical protein		02-3_01306	light grey	hypothetical protein	hypothetical protein		12-1_01306	light grey	hypothetical protein	hypothetical protein		01-1_01335	light grey	hypothetical protein	hypothetical protein		08-1_01316	orange	Acetyltransferase domain/family	GNAT family N-acetyltransferase
	LC_01827	light grey	Hypothetical protein	WP_148299771.1 hypothetical protein		RIMD_01805	green	functional gene	Threonine efflux protein////LysE family transporter//threonine transporter		S01_01277	light grey	hypothetical protein	hypothetical protein		02-3_01307	light grey	hypothetical protein	hypothetical protein		12-1_01307	light grey	hypothetical protein	DUF3601 domain-containing protein		01-1_01336	yellow	Enzyme/domain	Phosphoglycolate phosphatase		08-1_01317	orange	Acetyltransferase domain/family	GNAT family N-acetyltransferase
	LC_01828	orange	Acetyltransferase domain/family	Acetyltransferase (GNAT) domain		RIMD_01806	green	functional gene	VOC family protein		S01_01278	light grey	hypothetical protein	hypothetical protein		02-3_01308	light grey	hypothetical protein	hypothetical protein		12-1_01308	orange	Acetyltransferase domain/family	GNAT family N-acetyltransferase		01-1_01337	green	functional gene	NYN domain-containing protein		08-1_01318	green	functional gene	Glutathione S-transferase GST-6.0
	LC_01829	red	toxicity factor	AAA domain, putative AbiEii toxin, Type IV TA system		RIMD_01807	blue	Integrase/Transposase	Tyrosine recombinase XerD		S01_01279	light grey	hypothetical protein	hypothetical protein		02-3_01309	light grey	hypothetical protein	hypothetical protein		12-1_01309	light grey	hypothetical protein	DUF4236 domain-containing protein		01-1_01338	yellow	Enzyme/domain	serine protease		08-1_01319	green	functional gene	DinB family protein,damage-inducible protein DinB
	LC_01830	yellow	Enzyme/domain	WP_048669538.1 HNH endonuclease							S01_01280	light grey	hypothetical protein	hypothetical protein		02-3_01310	light grey	hypothetical protein	hypothetical protein		12-1_01310	green	functional gene	lasso peptide biosynthesis protein		01-1_01339	light grey	hypothetical protein	hypothetical protein		08-1_01320	green	functional gene	FRG domain-containing protein
	LC_01831	blue	Transposase	Transposase DDE domain							S01_01281	light grey	hypothetical protein	hypothetical protein		02-3_01311	light grey	hypothetical protein	hypothetical protein		12-1_01311	light grey	hypothetical protein	hypothetical protein		01-1_01340	orange	Acetyltransferase domain/family	Acetyltransferase		08-1_01321	light grey	hypothetical protein	hypothetical protein
	LC_01832	yellow	Enzyme/domain	WP_133152292.1 HNH endonuclease							S01_01282	light grey	hypothetical protein	hypothetical protein		02-3_01312	light grey	hypothetical protein	hypothetical protein		12-1_01312	yellow	Enzyme/domain	glyoxalase/bleomycin resistance/dioxygenase family protein		01-1_01341	orange	Acetyltransferase domain/family	GNAT family N-acetyltransferase		08-1_01322	orange	Acetyltransferase domain/family	Mycothiol acetyltransferase
	LC_01833	light grey	Hypothetical protein	hypothetical protein							S01_01283	green	functional gene	DUF6058 family natural product biosynthesis protein		02-3_01313	light grey	hypothetical protein	hypothetical protein		12-1_01313	light grey	hypothetical protein	DUF1311 domain-containing protein		01-1_01342	light grey	hypothetical protein	hypothetical protein		08-1_01323	red	toxicity factor	Toxin ParE1
	LC_01834	light grey	Hypothetical protein	WP_171371605.1 hypothetical protein							S01_01284	blue	Integrase/Transposase	IS5 family transposase ISVa2		02-3_01314	green	functional gene	DUF6058 family natural product biosynthesis protein		12-1_01314	yellow	Enzyme/domain	HNH endonuclease		01-1_01343	light grey	hypothetical protein	hypothetical protein		08-1_01324	red	toxicity factor	type II toxin-antitoxin system Phd/YefM family antitoxin,prevent-host-death protein
	LC_01835	yellow	Enzyme/domain	SEC-C motif							S01_01285	orange	Acetyltransferase domain/family	GNAT family N-acetyltransferase		02-3_01315	orange	Acetyltransferase domain/family	GNAT family N-acetyltransferase		12-1_01315	yellow	Enzyme/domain	CTP pyrophosphohydrolase		01-1_01344	orange	Acetyltransferase domain/family	GNAT family N-acetyltransferase		08-1_01325	light grey	hypothetical protein	hypothetical protein
	LC_01836	light grey	Hypothetical protein	WP_102269993.1 hypothetical protein							S01_01286	yellow	Enzyme/domain	RNA pyrophosphohydrolase		02-3_01316	yellow	Enzyme/domain	RNA pyrophosphohydrolase		12-1_01316	light grey	hypothetical protein	hypothetical protein		01-1_01345	orange	Acetyltransferase domain/family	GNAT family N-acetyltransferase		08-1_01326	blue	Integrase/Transposase	IS30 family transposase ISVa6
	LC_01837	blue	Transposase	Transposase DDE domain							S01_01287	yellow	Enzyme/domain	Peroxyureidoacrylate/ureidoacrylate amidohydrolase RutB		02-3_01317	yellow	Enzyme/domain	Peroxyureidoacrylate/ureidoacrylate amidohydrolase RutB		12-1_01317	green	functional gene	NERD domain-containing prote		01-1_01346	yellow	Enzyme/domain	AAA family ATPase		08-1_01327	yellow	Enzyme/domain	nucleotide pyrophosphohydrolase
	LC_01838	yellow	Enzyme/domain	HNH endonuclease							S01_01288	light grey	hypothetical protein	hypothetical protein		02-3_01318	light grey	hypothetical protein	hypothetical protein		12-1_01318	green	functional gene	NERD domain-containing protein		01-1_01347	orange	Acetyltransferase domain/family	GNAT family N-acetyltransferase		08-1_01328	yellow	Enzyme/domain	TM2 domain-containing protein
	LC_01839	yellow	Enzyme/domain	Methyltransferase domain							S01_01289	light grey	hypothetical protein	hypothetical protein		02-3_01319	light grey	hypothetical protein	hypothetical protein		12-1_01319	light grey	hypothetical protein	hypothetical protein		01-1_01348	orange	Acetyltransferase domain/family	GNAT family N-acetyltransferase		08-1_01329	light grey	hypothetical protein	DUF3601 domain-containing protein
	LC_01840	yellow	Enzyme/domain	Competence protein CoiA, contains predicted nuclease domain							S01_01290	light grey	hypothetical protein	DUF1801 domain-containing protein		02-3_01320	light grey	hypothetical protein	DUF1801 domain-containing protein		12-1_01320	light grey	hypothetical protein	hypothetical protein		01-1_01349	yellow	Enzyme/domain	Glutathione S-transferase GST-6.0		08-1_01330	orange	Acetyltransferase domain/family	GNAT family N-acetyltransferase
	LC_01841	red	toxicity factor	virulence-associated E family protein							S01_01291	yellow	Enzyme/domain	CTP pyrophosphohydrolase		02-3_01321	yellow	Enzyme/domain	CTP pyrophosphohydrolase		12-1_01321	light grey	hypothetical protein	hypothetical protein		01-1_01350	green	functional gene	DinB family protein,damage-inducible protein DinB		08-1_01331	blue	Integrase/Transposase	IS30 family transposase ISVa6
	LC_01842	yellow	Enzyme/domain	Helix-turn-helix domain							S01_01292	green	functional gene	aldehyde-activating protein、GFA family protein		02-3_01322	green	functional gene	aldehyde-activating protein，aldehyde-activating protein		12-1_01322	orange	Acetyltransferase domain/family	GNAT family N-acetyltransferase		01-1_01351	green	functional gene	FRG domain-containing protein		08-1_01332	light grey	hypothetical protein	DUF4236 domain-containing protein
	LC_01843	light grey	Hypothetical protein	WP_140086998.1 hypothetical protein							S01_01293	light grey	hypothetical protein	hypothetical protein		02-3_01323	light grey	hypothetical protein	hypothetical protein		12-1_01323	blue	Integrase/Transposase	IS481 family transposase ISVvu4		01-1_01352	light grey	hypothetical protein	hypothetical protein		08-1_01333	green	functional gene	lasso peptide biosynthesis protein
	LC_01844	blue	Integrase/core domain	Phage integrase family							S01_01294	light grey	hypothetical protein	hypothetical protein		02-3_01324	light grey	hypothetical protein	hypothetical protein							01-1_01353	orange	Acetyltransferase domain/family	Mycothiol acetyltransferase		08-1_01334	light grey	hypothetical protein	hypothetical protein
	LC_01845	yellow	Enzyme/domain	putative dGTPase							S01_01295	green	functional gene	VOC family protein,volatile organic compounds (VOC)		02-3_01325	green	functional gene	VOC family protein							01-1_01354	red	toxicity factor	Toxin ParE1		08-1_01335	green	functional gene	glyoxalase/bleomycin resistance/dioxygenase family protein
	LC_01846	orange	Acetyltransferase domain/family	Acetyltransferase (GNAT) family							S01_01296	light grey	hypothetical protein	hypothetical protein		02-3_01326	light grey	hypothetical protein	hypothetical protein							01-1_01355	red	toxicity factor	type II toxin-antitoxin system Phd/YefM family antitoxin,prevent-host-death protein		08-1_01336	light grey	hypothetical protein	DUF1311 domain-containing protein
	LC_01847	light grey	Hypothetical protein	WP_062851957.1 hypothetical protein							S01_01297	green	functional gene	Protein hit		02-3_01327	green	functional gene	Protein hit							01-1_01356	light grey	hypothetical protein	hypothetical protein		08-1_01337	yellow	Enzyme/domain	HNH endonuclease
	LC_01848	light grey	Hypothetical protein	WP_045371993.1 hypothetical protein							S01_01298	light grey	hypothetical protein	hypothetical protein		02-3_01328	light grey	hypothetical protein	hypothetical protein							01-1_01357	light grey	hypothetical protein	hypothetical protein		08-1_01338	yellow	Enzyme/domain	CTP pyrophosphohydrolase
	LC_01849	light grey	Hypothetical protein	WP_025538792.1 hypothetical protein							S01_01299	light grey	hypothetical protein	hypothetical protein		02-3_01329	light grey	hypothetical protein	hypothetical protein							01-1_01358	light grey	hypothetical protein	hypothetical protein		08-1_01339	light grey	hypothetical protein	hypothetical protein
	LC_01850	light grey	Hypothetical protein	WP_062851959.1 hypothetical protein							S01_01300	light grey	hypothetical protein	hypothetical protein		02-3_01330	light grey	hypothetical protein	hypothetical protein							01-1_01359	light grey	hypothetical protein	hypothetical protein		08-1_01340	light grey	hypothetical protein	hypothetical protein
	LC_01851	light grey	Hypothetical protein	Protein of unknown function (DUF523)							S01_01301	light grey	hypothetical protein	hypothetical protein		02-3_01331	light grey	hypothetical protein	hypothetical protein							01-1_01360	light grey	hypothetical protein	hypothetical protein		08-1_01341	green	functional gene	NERD domain-containing protein
	LC_01852	orange	Acetyltransferase domain/family	Acetyltransferase (GNAT) domain							S01_01302	green	functional gene	Peptidyl-lysine N-acetyltransferase YiaC		02-3_01332	orange	Acetyltransferase domain/family	Peptidyl-lysine N-acetyltransferase YiaC							01-1_01361	light grey	hypothetical protein	hypothetical protein		08-1_01342	light grey	hypothetical protein	hypothetical protein
	LC_01853	yellow	Enzyme/domain	'Cold-shock' DNA-binding domain							S01_01303	green	functional gene	Leucine efflux protein		02-3_01333	green	functional gene	Leucine efflux protein							01-1_01362	light grey	hypothetical protein	hypothetical protein		08-1_01343	light grey	hypothetical protein	hypothetical protein
	LC_01854	light grey	Hypothetical protein	WP_062851963.1 hypothetical protein							S01_01304	light grey	hypothetical protein	hypothetical protein		02-3_01334	light grey	hypothetical protein	hypothetical protein							01-1_01363	light grey	hypothetical protein	hypothetical protein		08-1_01344	light grey	hypothetical protein	hypothetical protein
	LC_01855	light grey	Hypothetical protein	WP_050933286.1 MULTISPECIES: hypothetical protein							S01_01305	orange	Acetyltransferase domain/family	GNAT family N-acetyltransferase		02-3_01335	orange	Acetyltransferase domain/family	GNAT family N-acetyltransferase							01-1_01364	yellow	Enzyme/domain	putative isomerase YddE		08-1_01345	orange	Acetyltransferase domain/family	GNAT family N-acetyltransferase
	LC_01856	light grey	Hypothetical protein	WP_062851965.1 hypothetical protein							S01_01306	light grey	hypothetical protein	hypothetical protein		02-3_01336	light grey	hypothetical protein	hypothetical protein							01-1_01365	orange	Acetyltransferase domain/family	GNAT family N-acetyltransferase		08-1_01346	blue	Integrase/Transposase	IS481 family transposase ISVvu4
	LC_01857	orange	Acetyltransferase domain/family	Acetyltransferase (GNAT) domain							S01_01307	green	functional gene	GIY-YIG nuclease family protein		02-3_01337	green	functional gene	GIY-YIG nuclease family protein							01-1_01366	light grey	hypothetical protein	hypothetical protein
	LC_01858	light grey	Hypothetical protein	WP_139046889.1 MULTISPECIES: hypothetical protein							S01_01308	light grey	hypothetical protein	hypothetical protein		02-3_01338	light grey	hypothetical protein	hypothetical protein							01-1_01367	light grey	hypothetical protein	hypothetical protein
	LC_01859	green	functional genes	Ubiquinol-cytochrome C chaperone							S01_01309	yellow	Enzyme/domain	phospholipase D/Transphosphatidylase		02-3_01339	yellow	Enzyme/domain	phospholipase D/Transphosphatidylase							01-1_01368	light grey	hypothetical protein	DUF2007 domain-containing protein
	LC_01860	yellow	Enzyme/domain	ACT domain							S01_01310	yellow	Enzyme/domain	Putative ribosomal N-acetyltransferase YdaF		02-3_01340	yellow	Enzyme/domain	Putative ribosomal N-acetyltransferase YdaF							01-1_01369	light grey	hypothetical protein	hypothetical protein
	LC_01861	green	functional genes	NTF2 fold immunity protein							S01_01311	green	functional gene	nucleotidyltransferase family protein		02-3_01341	green	functional gene	nucleotidyltransferase family protein							01-1_01370	blue	Integrase/Transposase	IS30 family transposase ISVa6
	LC_01862	light grey	Hypothetical protein	WP_021485044.1 hypothetical protein							S01_01312	yellow	Enzyme/domain	MazG-related protein，nitrate reductase		02-3_01342	green	functional gene	MazG-related protein							01-1_01371	light grey	hypothetical protein	hypothetical protein
	LC_01863	light grey	Hypothetical protein	WP_139124281.1 hypothetical protein							S01_01313	green	functional gene	nuclear transport factor 2 family protein		02-3_01343	green	functional gene	nuclear transport factor 2 family protein							01-1_01372	orange	Acetyltransferase domain/family	Mycothiol acetyltransferase
	LC_01864	green	functional genes	OsmC-like protein							S01_01314	green	functional gene	damage-inducible protein DinB，DinB family protein		02-3_01344	green	functional gene	damage-inducible protein DinB，DinB family protein							01-1_01373	yellow	Enzyme/domain	nucleotide pyrophosphohydrolase
	LC_01865	light grey	Hypothetical protein	WP_062858336.1 hypothetical protein							S01_01315	light grey	hypothetical protein	hypothetical protein		02-3_01345	light grey	hypothetical protein	hypothetical protein							01-1_01374	green	functional gene	TM2 domain-containing protein
	LC_01866	light grey	Hypothetical protein	WP_062858336.1 hypothetical protein							S01_01316	light grey	hypothetical protein	hypothetical protein		02-3_01346	light grey	hypothetical protein	hypothetical protein							01-1_01375	light grey	hypothetical protein	DUF3601 domain-containing protein
	LC_01867	light grey	Hypothetical protein	WP_086459349.1 hypothetical protein							S01_01317	green	functional gene	HEPN domain-containing protein		02-3_01347	green	functional gene	HEPN domain-containing protein，HEPN: a common domain in bacterial drug resistance and human neurodegenerative proteins							01-1_01376	orange	Acetyltransferase domain/family	GNAT family N-acetyltransferase
	LC_01868	green	functional genes	Glyoxalase/Bleomycin resistance protein/Dioxygenase superfamily							S01_01318	red	toxicity factor	Virulence protein		02-3_01348	red	toxicity factor	Virulence protein，VOC family protein							01-1_01377	light grey	hypothetical protein	UF4236 domain-containing protein
	LC_01869	light grey	Hypothetical protein	WP_005483293.1 hypothetical protein							S01_01319	light grey	hypothetical protein	hypothetical protein		02-3_01349	light grey	hypothetical protein	hypothetical protein							01-1_01378	green	functional gene	lasso peptide biosynthesis protein
	LC_01870	light grey	Hypothetical protein	WP_104210471.1 hypothetical protein							S01_01320	green	functional gene	energy transducer TonB		02-3_01350	green	functional gene	energy transducer TonB							01-1_01379	light grey	hypothetical protein	hypothetical protein
	LC_01871	light grey	Hypothetical protein	WP_140329214.1 hypothetical protein							S01_01321	green	functional gene	pyridoxamine 5'-phosphate oxidase family protein		02-3_01351	green	functional gene	pyridoxamine 5'-phosphate oxidase family protein							01-1_01380	green	functional gene	glyoxalase/bleomycin resistance/dioxygenase family protein
	LC_01872	light grey	Hypothetical protein	WP_047124015.1 hypothetical protein							S01_01322	green	functional gene	DUF2513 domain-containing protein		02-3_01352	green	functional gene	DUF2513 domain-containing protein							01-1_01381	light grey	hypothetical protein	DUF1311 domain-containing protein
	LC_01873	light grey	Hypothetical protein	WP_069538704.1 hypothetical protein							S01_01323	green	functional gene	cytochrome c oxidase assembly factor Coa1 family protein		02-3_01353	green	functional gene	cytochrome c oxidase assembly factor Coa1 family protein							01-1_01382	yellow	Enzyme/domain	HNH endonuclease
	LC_01874	blue	Integrase/core domain	integron integrase							S01_01324	light grey	hypothetical protein	hypothetical protein		02-3_01354	light grey	hypothetical protein	hypothetical protein							01-1_01383	yellow	Enzyme/domain	CTP pyrophosphohydrolase
											S01_01325	light grey	hypothetical protein	hypothetical protein		02-3_01355	light grey	hypothetical protein	hypothetical protein							01-1_01384	light grey	hypothetical protein	hypothetical protein
											S01_01326	red	toxicity factor	type II toxin-antitoxin system mRNA interferase toxin, RelE/StbE family		02-3_01356	red	toxicity factor	type II toxin-antitoxin system mRNA interferase toxin, RelE/StbE family							01-1_01385	light grey	hypothetical protein	hypothetical protein
											S01_01327	red	toxicity factor	type II toxin-antitoxin system RelB/DinJ family antitoxin		02-3_01357	red	toxicity factor	type II toxin-antitoxin system RelB/DinJ family antitoxin，TPA: damage-inducible protein J							01-1_01386	yellow	Enzyme/domain	NERD domain-containing protein
											S01_01328	light grey	hypothetical protein	hypothetical protein		02-3_01358	light grey	hypothetical protein	hypothetical protein							01-1_01387	light grey	hypothetical protein	hypothetical protein
											S01_01329	yellow	Enzyme/domain	antibiotic biosynthesis monooxygenase		02-3_01359	green	functional gene	antibiotic biosynthesis monooxygenase							01-1_01388	light grey	hypothetical protein	hypothetical protein
											S01_01330	light grey	hypothetical protein	hypothetical protein		02-3_01360	light grey	hypothetical protein	hypothetical protein							01-1_01389	light grey	hypothetical protein	hypothetical protein
											S01_01331	light grey	hypothetical protein	hypothetical protein		02-3_01361	light grey	hypothetical protein	hypothetical protein							01-1_01390	orange	Acetyltransferase domain/family	GNAT family N-acetyltransferase
											S01_01332	light grey	hypothetical protein	DUF523 domain-containing protein		02-3_01362	light grey	hypothetical protein	DUF523 domain-containing protein							01-1_01391	blue	Integrase/Transposase	IS481 family transposase ISVvu4
											S01_01333	light grey	hypothetical protein	DUF4476 domain-containing protein		02-3_01363	light grey	hypothetical protein	DUF4476 domain-containing protein
											S01_01334	blue	Integrase/Transposase	IS5 family transposase ISVa2		02-3_01364	light grey	hypothetical protein	hypothetical protein
											S01_01335	light grey	hypothetical protein	hypothetical protein		02-3_01365	yellow	Enzyme/domain	(4S)-4-hydroxy-5-phosphonooxypentane-2,3-dione isomerase
											S01_01336	yellow	Enzyme/domain	(4S)-4-hydroxy-5-phosphonooxypentane-2,3-dione isomerase		02-3_01366	light grey	hypothetical protein	hypothetical protein
											S01_01337	light grey	hypothetical protein	hypothetical protein		02-3_01367	light grey	hypothetical protein	hypothetical protein
											S01_01338	light grey	hypothetical protein	hypothetical protein		02-3_01368	green	functional gene	TPA: VOC family protein
											S01_01339	green	functional gene	TPA: VOC family protein		02-3_01369	yellow	Enzyme/domain	Phosphoglycolate phosphatase
											S01_01340	yellow	Enzyme/domain	Phosphoglycolate phosphatase		02-3_01370	light grey	hypothetical protein	hypothetical protein
											S01_01341	light grey	hypothetical protein	hypothetical protein		02-3_01371	light grey	hypothetical protein	hypothetical protein
											S01_01342	light grey	hypothetical protein	hypothetical protein		02-3_01372	light grey	hypothetical protein	hypothetical protein
											S01_01343	light grey	hypothetical protein	hypothetical protein		02-3_01373	yellow	Enzyme/domain	Putative HAD-hydrolase YfnB
											S01_01344	yellow	Enzyme/domain	Putative HAD-hydrolase YfnB		02-3_01374	light grey	hypothetical protein	hypothetical protein
											S01_01345	light grey	hypothetical protein	hypothetical protein		02-3_01375	light grey	hypothetical protein	DUF4160 domain-containing protein
											S01_01346	light grey	hypothetical protein	DUF4160 domain-containing protein		02-3_01376	light grey	hypothetical protein	DUF2442 domain-containing protein
											S01_01347	light grey	hypothetical protein	DUF2442 domain-containing protein		02-3_01377	yellow	Enzyme/domain	Mycothiol acetyltransferase
											S01_01348	orange	Acetyltransferase domain/family	Mycothiol acetyltransferase		02-3_01378	green	hypothetical protein	hypothetical protein
											S01_01349	light grey	hypothetical protein	hypothetical protein		02-3_01379	blue	Integrase/Transposase	IS5 family transposase ISVa2
											S01_01350	light grey	hypothetical protein	hypothetical protein		02-3_01380	light grey	hypothetical protein	hypothetical protein
											S01_01351	light grey	hypothetical protein	hypothetical protein		02-3_01381	light grey	hypothetical protein	hypothetical protein
											S01_01352	light grey	hypothetical protein	hypothetical protein		02-3_01382	light grey	hypothetical protein	hypothetical protein
											S01_01353	light grey	hypothetical protein	hypothetical protein		02-3_01383	light grey	hypothetical protein	hypothetical protein
											S01_01354	yellow	Enzyme/domain	nucleotide pyrophosphohydrolase		02-3_01384	yellow	Enzyme/domain	nucleotide pyrophosphohydrolase
											S01_01355	red	toxicity factor	RelA/SpoT domain-containing protein,toxin-antitoxin system		02-3_01385	green	functional gene	Protein YhfA
											S01_01356	red	toxicity factor	RelA/SpoT domain-containing protein		02-3_01386	green	functional gene	RelA/SpoT domain-containing protein
											S01_01357	light grey	hypothetical protein	hypothetical protein		02-3_01387	light grey	hypothetical protein	hypothetical protein
											S01_01358	light grey	hypothetical protein	hypothetical protein		02-3_01388	light grey	hypothetical protein	hypothetical protein
											S01_01359	light grey	hypothetical protein	hypothetical protein		02-3_01389	light grey	hypothetical protein	hypothetical protein
											S01_01360	green	functional gene	Mannitol operon repressor		02-3_01390	green	functional gene	Mannitol operon repressor
											S01_01361	orange	Acetyltransferase domain/family	Acetyltransferase		02-3_01391	orange	Acetyltransferase domain/family	Acetyltransferase
											S01_01362	light grey	hypothetical protein	hypothetical protein		02-3_01392	light grey	hypothetical protein	hypothetical protein
											S01_01363	green	functional gene	ATP-binding protein		02-3_01393	green	functional gene	ATP-binding protein
											S01_01364	light grey	hypothetical protein	hypothetical protein		02-3_01394	light grey	hypothetical protein	hypothetical protein
											S01_01365	light grey	hypothetical protein	hypothetical protein		02-3_01395	light grey	hypothetical protein	hypothetical protein
											S01_01366	light grey	hypothetical protein	Insertion element IS6110 uncharacterized 12.0 kDa protein		02-3_01396	light grey	hypothetical protein	Insertion element IS6110 uncharacterized 12.0 kDa protein
											S01_01367	blue	Integrase/Transposase	IS3 family transposase		02-3_01397	blue	Integrase/Transposase	IS3 family transposase
											S01_01368	blue	Integrase/Transposase	Putative transposase InsK for insertion sequence element IS150		02-3_01398	blue	Integrase/Transposase	Putative transposase InsK for insertion sequence element IS150
											S01_01369	blue	Integrase/Transposase	DDE-type integrase/transposase/recombinase，IS3 family transposase		02-3_01399	blue	Integrase/Transposase	DDE-type integrase/transposase/recombinase，IS3 family transposase
											S01_01370	light grey	hypothetical protein	hypothetical protein		02-3_01400	light grey	hypothetical protein	hypothetical protein
											S01_01371	light grey	hypothetical protein	hypothetical protein		02-3_01401	light grey	hypothetical protein	hypothetical protein
											S01_01372	orange	Acetyltransferase domain/family	GNAT family N-acetyltransferase		02-3_01402	light grey	hypothetical protein	hypothetical protein
											S01_01373	blue	Integrase/Transposase	IS481 family transposase ISVvu4		02-3_01403	blue	Integrase/Transposase	IS5 family transposase ISVa2
																02-3_01404	orange	Acetyltransferase domain/family	GNAT family N-acetyltransferase
																02-3_01405	blue	Integrase/Transposase	IS481 family transposase ISVvu4
