# Supplementary material for: Comparative Genomic Analysis of Shrimp-Pathogenic Vibrio parahaemolyticus LC and Intraspecific Strains with Emphasis on Virulent Factors of Mobile Genetic Elements
Source: Microorganisms. 2023 Nov 11;11(11):2752. doi: 10.3390/microorganisms11112752 (PMC10672994; doi:10.3390/microorganisms11112752)
Supplement: Supplementary file 1 [file microorganisms-11-02752-s001.zip › Table S4.xlsx]

## Sheet: Table S4
Table S4 Gene contents of plasmid p96 of Vibrio parahaemolyticus LC with homologs of other three intraspecific strains
	Strain LC						Strain 01-1						Strain 08-1					Strain 12-1
	Gene locus	Colour	Gene name	Gene annotation			Gene locus	Colour	Gene name	Gene annotation			Gene locus	Colour	Gene name	Gene annotation		Gene locus	Colour	Gene name	Gene annotation
	LC_04907	blue		ISNCY family transposase ISRor2			01-1_04927	light pink	traI	Protein TraI			08-1_04863	orange		Type IV secretion system protein VirB11		12-1_04795	light grey		hypothetical protein
	LC_04908	green		Iron-sulfur cluster carrier protein			01-1_04928	green		relaxase/mobilization nuclease domain-containing protein			08-1_04864	light grey		hypothetical protein		12-1_04796	red	ompA_10	Outer membrane protein A
	LC_04909	red	virB	Virulence regulon transcriptional activator VirB			01-1_04929	light grey		hypothetical protein			08-1_04865	light grey		hypothetical protein		12-1_04797	light grey		hypothetical protein
	LC_04910	yellow		metallophosphoesterase			01-1_04930	light grey		hypothetical protein			08-1_04866	yellow		type I restriction endonuclease subunit		12-1_04798	light grey		hypothetical protein
	LC_04911	yellow		transglutaminase-like cysteine peptidase			01-1_04931	green		zincin-like metallopeptidase domain-containing protein			08-1_04867	light grey		hypothetical protein		12-1_04799	light grey		hypothetical protein
	LC_04912	green		Ig-like domain-containing protein			01-1_04932	light grey		hypothetical protein			08-1_04868	light grey		DUF2913 family protein		12-1_04800	light grey		hypothetical protein
	LC_04913	red	ompA_10	Outer membrane protein A			01-1_04933	orange	virB1_1	Type IV secretion system protein virB1			08-1_04869	light grey		hypothetical protein		12-1_04801	green		fimbrial biogenesis outer membrane usher protein
	LC_04914	blue		IS3 family transposase ISVch4			01-1_04934	yellow		restriction endonuclease			08-1_04870	light grey		hypothetical protein		12-1_04802	light grey		hypothetical protein
	LC_04915	blue		IS3 family transposase ISVch4			01-1_04935	yellow	topB_2	DNA topoisomerase 3			08-1_04871	light grey		hypothetical protein		12-1_04803	light grey		hypothetical protein
	LC_04916	red	ompA_11	Outer membrane protein A			01-1_04936	light grey		hypothetical protein			08-1_04872	light grey		hypothetical protein		12-1_04804	blue		IS5 family transposase ISVpa3
	LC_04917	light grey		hypothetical protein			01-1_04937	light pink		conjugative transfer signal peptidase TraF			08-1_04873	light grey		hypothetical protein		12-1_04805	blue		IS5/IS1182 family transposase
	LC_04918	light grey		hypothetical protein			01-1_04938	light pink	traG	Conjugal transfer protein TraG			08-1_04874	yellow	hin_2	DNA-invertase hin		12-1_04806	green		replication initiation protein
	LC_04919	light grey		hypothetical protein			01-1_04939	light grey		hypothetical protein			08-1_04875	light grey		hypothetical protein		12-1_04807	green		AHH domain-containing protein
	LC_04920	red	ompA_12	Outer membrane protein A			01-1_04940	light grey		hypothetical protein			08-1_04876	light grey		hypothetical protein		12-1_04808	light grey		hypothetical protein
	LC_04921	light grey		hypothetical protein			01-1_04941	light grey		hypothetical protein			08-1_04877	light grey		hypothetical protein		12-1_04809	red	mazF	Endoribonuclease toxin MazF
	LC_04922	light grey		hypothetical protein			01-1_04942	green	pal_12	Peptidoglycan-associated lipoprotein			08-1_04878	green		recombinase family protein		12-1_04810	red	mazE	Antitoxin MazE
	LC_04923	green		fimbrial biogenesis outer membrane usher protein			01-1_04943	light grey		hypothetical protein			08-1_04879	green		recombinase family protein		12-1_04811	blue	xerC_7	Tyrosine recombinase XerC
	LC_04924	light grey		hypothetical protein			01-1_04944	light pink		conjugal transfer protein TrbI			08-1_04880	light grey		hypothetical protein		12-1_04812	green		recombinase family protein
	LC_04925	light grey		hypothetical protein			01-1_04945	light grey		hypothetical protein			08-1_04881	light grey		hypothetical protein		12-1_04813	light grey		hypothetical protein
	LC_04926	blue		IS5 family transposase ISVpa3			01-1_04946	light pink		P-type conjugative transfer protein TrbG			08-1_04882	light grey		hypothetical protein		12-1_04814	light grey		hypothetical protein
	LC_04927	blue		IS5/IS1182 family transposase			01-1_04947	orange		type IV secretion system protein			08-1_04883	light grey		hypothetical protein		12-1_04815	green		Ice-binding protein 1
	LC_04928	green		replication initiation protein			01-1_04948	light pink		P-type conjugative transfer protein TrbL			08-1_04884	light grey		hypothetical protein		12-1_04816	green		Ig-like domain-containing protein
	LC_04929	green		AHH domain-containing protein			01-1_04949	light grey		hypothetical protein			08-1_04885	light grey		hypothetical protein		12-1_04817	blue		IS630 family transposase ISSod10
	LC_04930	light grey		hypothetical protein			01-1_04950	light pink		P-type conjugative transfer protein TrbJ			08-1_04886	green		outer membrane beta-barrel protein		12-1_04818	light grey		hypothetical protein
	LC_04931	red	mazF	Endoribonuclease toxin MazF			01-1_04951	light pink		conjugal transfer protein TrbE			08-1_04887	red	ompA_10	Outer membrane protein A		12-1_04819	light grey		hypothetical protein
	LC_04932	red	mazE	Antitoxin MazE			01-1_04952	light pink		conjugal transfer protein TrbD			08-1_04888	blue	tnpR_2	Transposon Tn3 resolvase		12-1_04820	red	ompA_11	Outer membrane protein P5
	LC_04933	blue	xerC_6	Tyrosine recombinase XerC			01-1_04953	light pink		TrbC/VirB2 family protein			08-1_04889	light grey		hypothetical protein		12-1_04821	green	fis_2	DNA-binding protein Fis
	LC_04934	green		recombinase family protein			01-1_04954	light grey		hypothetical protein			08-1_04890	green		Spy/CpxP family protein refolding chaperone		12-1_04822	light grey		hypothetical protein
	LC_04935	light grey		hypothetical protein			01-1_04955	light grey		hypothetical protein			08-1_04891	green		replication initiation protein		12-1_04823	light grey		hypothetical protein
	LC_04936	light grey		hypothetical protein			01-1_04956	blue	rpnA_1	Recombination-promoting nuclease RpnA			08-1_04892	blue		IS6 family transposase		12-1_04824	green		peptidoglycan DD-metalloendopeptidase family protein
	LC_04937	green		Ice-binding protein 1			01-1_04957	blue		Tn3 family transposase ISShfr9			08-1_04893	green		recombinase family protein		12-1_04825	red	ccdB	Toxin CcdB
	LC_04938	green		Ig-like domain-containing protein			01-1_04958	yellow	bin3_1	Putative transposon Tn552 DNA-invertase bin3			08-1_04894	red		type II toxin-antitoxin system CcdA family antitoxin		12-1_04826	red		type II toxin-antitoxin system CcdA family antitoxin
	LC_04939	blue		IS630 family transposase ISSod10			01-1_04959	light grey		hypothetical protein			08-1_04895	red	ccdB	Toxin CcdB		12-1_04827	green		recombinase family protein
	LC_04940	light grey		hypothetical protein			01-1_04960	light grey		hypothetical protein			08-1_04896	green		peptidoglycan DD-metalloendopeptidase family protein		12-1_04828	blue		IS6 family transposase
	LC_04941	light grey		hypothetical protein			01-1_04961	blue		ISNCY family transposase ISRor2			08-1_04897	light grey		hypothetical protein		12-1_04829	green		replication initiation protein
	LC_04942	red	ompA_13	Outer membrane protein P5			01-1_04962	green		Iron-sulfur cluster carrier protein			08-1_04898	light grey		hypothetical protein		12-1_04830	green		Spy/CpxP family protein refolding chaperone
	LC_04943	green	fis_2	DNA-binding protein Fis			01-1_04963	red	virB	Virulence regulon transcriptional activator VirB			08-1_04899	green	fis_2	DNA-binding protein Fis		12-1_04831	light grey		hypothetical protein
	LC_04944	light grey		hypothetical protein			01-1_04964	yellow		metallophosphoesterase			08-1_04900	red	ompA_11	Outer membrane protein P5		12-1_04832	blue	tnpR_2	Transposon Tn3 resolvase
	LC_04945	light grey		hypothetical protein			01-1_04965	yellow		transglutaminase-like cysteine peptidase			08-1_04901	light grey		hypothetical protein		12-1_04833	red	ompA_12	Outer membrane protein A
	LC_04946	green		peptidoglycan DD-metalloendopeptidase family protein			01-1_04966	green		Ig-like domain-containing protein			08-1_04902	light grey		hypothetical protein		12-1_04834	green		outer membrane beta-barrel protein
	LC_04947	red	ccdB	Toxin CcdB			01-1_04967	red	ompA_10	Outer membrane protein A			08-1_04903	blue		IS630 family transposase ISSod10		12-1_04835	light grey		hypothetical protein
	LC_04948	red		type II toxin-antitoxin system CcdA family antitoxin			01-1_04968	blue		IS3 family transposase ISVch4			08-1_04904	light grey		DUF1566 domain-containing protein		12-1_04836			无
	LC_04949	green		recombinase family protein			01-1_04969	blue		IS3 family transposase ISVch4			08-1_04905	green		Ice-binding protein 1		12-1_04837	light grey		hypothetical protein
	LC_04950	blue		IS6 family transposase			01-1_04970	red	ompA_11	Outer membrane protein A			08-1_04906	light grey		hypothetical protein		12-1_04838	light grey		hypothetical protein
	LC_04951	green		replication initiation protein			01-1_04971	light grey		hypothetical protein			08-1_04907	light grey		hypothetical protein		12-1_04839	light grey		hypothetical protein
	LC_04952	green		Spy/CpxP family protein refolding chaperone			01-1_04972	light grey		hypothetical protein			08-1_04908	green		recombinase family protein		12-1_04840	light grey		hypothetical protein
	LC_04953	light grey		hypothetical protein			01-1_04973	light grey		hypothetical protein			08-1_04909	blue	xerC_9	Tyrosine recombinase XerC		12-1_04841	green		recombinase family protein
	LC_04954	blue	tnpR_2	Transposon Tn3 resolvase			01-1_04974	red	ompA_12	Outer membrane protein A			08-1_04910	red	mazE	Antitoxin MazE		12-1_04842	green		recombinase family protein
	LC_04955	red	ompA_14	Outer membrane protein A			01-1_04975	light grey		hypothetical protein			08-1_04911	red	mazF	Endoribonuclease toxin MazF		12-1_04843	light grey		hypothetical protein
	LC_04956	light grey		hypothetical protein			01-1_04976	light grey		hypothetical protein			08-1_04912	light grey		hypothetical protein		12-1_04844	light grey		hypothetical protein
	LC_04957	light grey		hypothetical protein			01-1_04977	green		fimbrial biogenesis outer membrane usher protein			08-1_04913	green		AHH domain-containing protein		12-1_04845	light grey		hypothetical protein
	LC_04958	light grey		hypothetical protein			01-1_04978	light grey		hypothetical protein			08-1_04914	green		replication initiation protein		12-1_04846	yellow	hin	DNA-invertase hin
	LC_04959	light grey		hypothetical protein			01-1_04979	light grey		hypothetical protein			08-1_04915	blue		IS5/IS1182 family transposase		12-1_04847	light grey		hypothetical protein
	LC_04960	light grey		hypothetical protein			01-1_04980	blue		IS5 family transposase ISVpa3			08-1_04916	blue		IS5 family transposase ISVpa3		12-1_04848	light grey		hypothetical protein
	LC_04961	light grey		hypothetical protein			01-1_04981	blue		IS5/IS1182 family transposase			08-1_04917	light grey		hypothetical protein		12-1_04849	green		toll/interleukin-1 receptor domain-containing protein
	LC_04962	light grey		hypothetical protein			01-1_04982	green		replication initiation protein			08-1_04918	light grey		hypothetical protein		12-1_04850	light grey		hypothetical protein
	LC_04963	green		recombinase family protein			01-1_04983	green		AHH domain-containing protein			08-1_04919	green		fimbrial biogenesis outer membrane usher protein		12-1_04851	light grey		DUF2913 family protein
	LC_04964	green		recombinase family protein			01-1_04984	light grey		hypothetical protein			08-1_04920	light grey		hypothetical protein		12-1_04852	light grey		hypothetical protein
	LC_04965	light grey		hypothetical protein			01-1_04985	red	mazF	Endoribonuclease toxin MazF			08-1_04921	light grey		hypothetical protein		12-1_04853	yellow	traC_2	DNA primase TraC
	LC_04966	light grey		hypothetical protein			01-1_04986	red	mazE	Antitoxin MazE			08-1_04922	red	ompA_12	Outer membrane protein A		12-1_04854	light grey		hypothetical protein
	LC_04967	light grey		hypothetical protein			01-1_04987	blue	xerC_8	Tyrosine recombinase XerC			08-1_04923	light grey		hypothetical protein		12-1_04855	green	klcA_1	Antirestriction protein KlcA
	LC_04968	yellow	hin_2	DNA-invertase hin			01-1_04988	green		recombinase family protein			08-1_04924	light grey		hypothetical protein		12-1_04856	light grey		hypothetical protein
	LC_04969	light grey		hypothetical protein			01-1_04989	light grey		hypothetical protein			08-1_04925	light grey		hypothetical protein		12-1_04857	light grey		hypothetical protein
	LC_04970	light grey		hypothetical protein			01-1_04990	light grey		hypothetical protein			08-1_04926	red	ompA_13	Outer membrane protein A		12-1_04858	light grey		hypothetical protein
	LC_04971	light grey		hypothetical protein			01-1_04991	green		Ice-binding protein 1			08-1_04927	blue		IS3 family transposase ISVch4		12-1_04859	light grey		hypothetical protein
	LC_04972	light grey		hypothetical protein			01-1_04992	light grey		DUF1566 domain-containing protein			08-1_04928	blue		IS3 family transposase ISVch4		12-1_04860	light grey		hypothetical protein
	LC_04973	light grey		hypothetical protein			01-1_04993	blue		IS630 family transposase ISSod10			08-1_04929	red	ompA_14	Outer membrane protein A		12-1_04861	yellow	topB_2	DNA topoisomerase 3
	LC_04974	light grey		DUF2913 family protein			01-1_04994	light grey		hypothetical protein			08-1_04930	green		Ig-like domain-containing protein		12-1_04862	yellow	topB_3	DNA topoisomerase 3
	LC_04975	light grey		hypothetical protein			01-1_04995	light grey		hypothetical protein			08-1_04931	yellow		transglutaminase-like cysteine peptidase		12-1_04863	green		MobC family replication-relaxation protein
	LC_04976	yellow		type I restriction endonuclease subunit			01-1_04996	red	ompA_13	Outer membrane protein P5			08-1_04932	yellow		metallophosphoesterase		12-1_04864	light grey		hypothetical protein
	LC_04977	light grey		hypothetical protein			01-1_04997	green	fis_2	DNA-binding protein Fis			08-1_04933	red	virB	Virulence regulon transcriptional activator VirB		12-1_04865	light grey		hypothetical protein
	LC_04978	light grey		hypothetical protein			01-1_04998	light grey		hypothetical protein			08-1_04934	green		Iron-sulfur cluster carrier protein		12-1_04866	green	hns_2	TraM recognition domain-containing protein
	LC_04979	light grey		hypothetical protein			01-1_04999	light grey		hypothetical protein			08-1_04935	blue		ISNCY family transposase ISRor2		12-1_04867	light grey		hypothetical protein
	LC_04980	orange		Type IV secretion system protein VirB11			01-1_05000	green		Ice-binding protein 1			08-1_04936	light grey		hypothetical protein		12-1_04868	light grey		hypothetical protein
	LC_04981	light grey		hypothetical protein			01-1_05001	red	ccdB	Toxin CcdB			08-1_04937	light grey		hypothetical protein		12-1_04869	light grey		hypothetical protein
	LC_04982	light pink	traL	Protein TraL			01-1_05002	red		type II toxin-antitoxin system CcdA family antitoxin			08-1_04938	yellow		Putative transposon Tn552 DNA-invertase bin3		12-1_04870	light grey		hypothetical protein
	LC_04983	light grey		hypothetical protein			01-1_05003	green		recombinase family protein			08-1_04939	blue		Tn3 family transposase ISShfr9		12-1_04871	light grey		hypothetical protein
	LC_04984	light grey		hypothetical protein			01-1_05004	blue		IS6 family transposase			08-1_04940	blue	rpnA	Recombination-promoting nuclease RpnA		12-1_04872	orange	virB1_1	Type IV secretion system protein virB1
	LC_04985	light pink	traI_2	Protein TraI			01-1_05005	green		replication initiation protein			08-1_04941	blue		IS5 family transposase ISVa2		12-1_04873	light pink		conjugative transfer signal peptidase TraF
	LC_04986	light grey		hypothetical protein			01-1_05006	green		Spy/CpxP family protein refolding chaperone			08-1_04942	light grey		hypothetical protein		12-1_04874	light grey		hypothetical protein
	LC_04987	light grey		hypothetical protein			01-1_05007	light grey		hypothetical protein			08-1_04943	light grey		hypothetical protein		12-1_04875	light grey		hypothetical protein
	LC_04988	green		zincin-like metallopeptidase domain-containing protein			01-1_05008	blue		Transposon Tn3 resolvase			08-1_04944	light pink		TrbC/VirB2 family protein		12-1_04876	yellow		trypsin-like serine protease
	LC_04989	light grey		hypothetical protein			01-1_05009	red	ompA_14	Outer membrane protein A			08-1_04945	light pink		conjugal transfer protein TrbD		12-1_04877	light grey		hypothetical protein
	LC_04990	orange	virB1_1	Type IV secretion system protein virB1			01-1_05010	green		outer membrane beta-barrel protein			08-1_04946	light pink		conjugal transfer protein TrbE		12-1_04878	orange		type II secretion system protein
	LC_04991	yellow		restriction endonuclease			01-1_05011	light grey		hypothetical protein			08-1_04947	light pink		P-type conjugative transfer protein TrbJ		12-1_04879	green		hypothetical protein
	LC_04992	yellow	topB_2	DNA topoisomerase 3			01-1_05012	light grey		hypothetical protein			08-1_04948	light grey		hypothetical protein		12-1_04880	light grey		hypothetical protein
	LC_04993	light grey		hypothetical protein			01-1_05013	light grey		hypothetical protein			08-1_04949	light pink		P-type conjugative transfer protein TrbL		12-1_04881	light grey		hypothetical protein
	LC_04994	light pink		conjugative transfer signal peptidase TraF			01-1_05014	light grey		hypothetical protein			08-1_04950	orange		type IV secretion system protein		12-1_04882	orange	epsE_3	Type II secretion system protein E
	LC_04995	light pink	traG	Conjugal transfer protein TraG			01-1_05015	light grey		hypothetical protein			08-1_04951	light pink		P-type conjugative transfer protein TrbG		12-1_04883	yellow		ATPase, T2SS/T4P/T4SS family
	LC_04996	light grey		hypothetical protein			01-1_05016	light grey		hypothetical protein			08-1_04952	light grey		hypothetical protein		12-1_04884	light grey		hypothetical protein
	LC_04997	light grey		hypothetical protein			01-1_05017	green		helix-turn-helix domain-containing protein			08-1_04953	light pink		conjugal transfer protein TrbI		12-1_04885	light grey		hypothetical protein
	LC_04998	light grey		hypothetical protein			01-1_05018	green		recombinase family protein			08-1_04954	light grey		hypothetical protein		12-1_04886	orange	sctC_5	Type 3 secretion system secretin
	LC_04999	green	pal_12	Peptidoglycan-associated lipoprotein			01-1_05019	light grey		hypothetical protein			08-1_04955	green	pal_12	Peptidoglycan-associated lipoprotein		12-1_04887	light grey		hypothetical protein
	LC_05000	light grey		hypothetical protein			01-1_05020	light grey		hypothetical protein			08-1_04956	light grey		hypothetical protein		12-1_04888	light pink		TrbI/VirB10 family protein
	LC_05001	light grey		hypothetical protein			01-1_05021	light grey		hypothetical protein			08-1_04957	light grey		hypothetical protein		12-1_04889	light grey		hypothetical protein
	LC_05002	light grey		hypothetical protein			01-1_05022	yellow	hin	DNA-invertase hin			08-1_04958	light grey		hypothetical protein		12-1_04890	light pink		P-type conjugative transfer protein TrbG
	LC_05003	light pink		P-type conjugative transfer protein TrbG			01-1_05023	light grey		hypothetical protein			08-1_04959	light pink	traG	Conjugal transfer protein TraG		12-1_04891	light pink		VirB8/TrbF family protein
	LC_05004	orange		type IV secretion system protein			01-1_05024	light grey		hypothetical protein			08-1_04960	light pink		conjugative transfer signal peptidase TraF		12-1_04892	light grey		hypothetical protein
	LC_05005	light pink		P-type conjugative transfer protein TrbL			01-1_05025	light grey		hypothetical protein			08-1_04961	light grey		hypothetical protein		12-1_04893	light pink		P-type conjugative transfer protein TrbL
	LC_05006	light grey		hypothetical protein			01-1_05026	light grey		hypothetical protein			08-1_04962	yellow	topB_2	DNA topoisomerase 3		12-1_04894	orange		Type IV secretion system protein VirB11
	LC_05007	light pink		P-type conjugative transfer protein TrbJ			01-1_05027	light grey		hypothetical protein			08-1_04963	yellow		restriction endonuclease		12-1_04895	light pink		P-type conjugative transfer protein TrbJ
	LC_05008	light pink		conjugal transfer protein TrbE			01-1_05028	light grey		DUF2913 family protein			08-1_04964	orange	virB1_1	Type IV secretion system protein virB1		12-1_04896	orange	virB4_1	Type IV secretion system protein virB4
	LC_05009	light pink		conjugal transfer protein TrbD			01-1_05029	light grey		hypothetical protein			08-1_04965	light grey		hypothetical protein		12-1_04897	light pink		conjugal transfer protein TrbD
	LC_05010	light pink		TrbC/VirB2 family protein			01-1_05030	green		type I restriction endonuclease subunit M			08-1_04966	green		zincin-like metallopeptidase domain-containing protein		12-1_04898	light pink		TrbC/VirB2 family protein
							01-1_05031	light grey		hypothetical protein			08-1_04967	light grey		hypothetical protein		12-1_04899	green		XRE family transcriptional regulator
						Integrase/Transposase/recombinase	01-1_05032	light grey		hypothetical protein			08-1_04968	light grey		hypothetical protein		12-1_04900	green	prtR	HTH-type transcriptional regulator PrtR
						conjugative transfer protein	01-1_05033	light grey		hypothetical protein			08-1_04969	light pink	traI	Protein TraI		12-1_04901	light grey		hypothetical protein
						Hypothetical protein	01-1_05034	orange		Type IV secretion system protein VirB11			08-1_04970	light grey		hypothetical protein		12-1_04902	light grey		hypothetical protein
						Functional enzyme/domain	01-1_05035	light grey		hypothetical protein			08-1_04971	light grey		hypothetical protein		12-1_04903	light grey		hypothetical protein
						Toxicity factor	01-1_05036	light pink	traL	Protein TraL			08-1_04972	light pink	traL	Protein TraL		12-1_04904	light grey		hypothetical protein
						Functional gene	01-1_05037	light grey		hypothetical protein			08-1_04973	light grey		hypothetical protein		12-1_04905	green		Iron-sulfur cluster carrier protein
							01-1_05038	light grey		hypothetical protein								12-1_04906	red	virB	Virulence regulon transcriptional activator VirB
																		12-1_04907	light grey		hypothetical protein
																		12-1_04908	yellow		metallophosphoesterase
																		12-1_04909	yellow		transglutaminase-like cysteine peptidase
																		12-1_04910	green		Ig-like domain-containing protein
																		12-1_04911	red	ompA_13	Outer membrane protein A
																		12-1_04912	blue		IS3 family transposase ISVch4
																		12-1_04913	blue		IS3 family transposase ISVch4
																		12-1_04914	red	ompA_14	Outer membrane protein A
																		12-1_04915	light grey		hypothetical protein
																		12-1_04916	light grey		hypothetical protein
																		12-1_04917	light grey		hypothetical protein
