# Supplementary material for: Comparative Genomic Analysis of Shrimp-Pathogenic Vibrio parahaemolyticus LC and Intraspecific Strains with Emphasis on Virulent Factors of Mobile Genetic Elements
Source: Microorganisms. 2023 Nov 11;11(11):2752. doi: 10.3390/microorganisms11112752 (PMC10672994; doi:10.3390/microorganisms11112752)
Supplement: Supplementary file 1 [file microorganisms-11-02752-s001.zip › Table S5.xlsx]

## Sheet: Table S5
Table S5 Gene contents of plasmid p71 of Vibrio parahaemolyticus LC with homologs of other three intraspecific stasins
	Strain LC					Strain S01					Strain 02-3					Strain 01-1
	Gene locus	Colour	Gene name	Gene annotation		Gene locus	Colour	Gene name	Gene annotation		Gene locus	Colour	Gene name	Gene annotation		Gene locus	Colour	Gene name	Gene annotation
	LC_05011	blue		Tn3 family transposase ISYps3		S01_03932	red	yenA	Tc toxin subunit A, insecticidal toxin complex protein TcdA		02-3_04976	red	rhs	RHS repeat protein, insecticidal toxin complex protein TccC3		01-1_05039	light grey		hypothetical protein
	LC_05012	light grey		hypothetical protein		S01_03933	red	yenB	Toxin subunit YenB		02-3_04977	red	yenB	Toxin subunit YenB		01-1_05040	green		ParA family protein
	LC_05013	light grey		hypothetical protein		S01_03934	red	rhs	RHS repeat protein, insecticidal toxin complex protein TccC3		02-3_04978	red	yenA2	Toxin subunit YenA2		01-1_05041	light grey		hypothetical protein
	LC_05014	blue		ISNCY family transposase ISVsa17							02-3_04979	red	yenA	Tc toxin subunit A, insecticidal toxin complex protein TcdA		01-1_05042	light grey		hypothetical protein
	LC_05015	green	virC1	Protein virC1												01-1_05043	green	smc_11	Chromosome partition protein Smc
	LC_05016	light grey		hypothetical protein												01-1_05044	light grey		hypothetical protein
	LC_05017	light grey		hypothetical protein												01-1_05045	light grey		hypothetical protein
	LC_05018	green	smc_9	Chromosome partition protein Smc												01-1_05046	blue		IS481 family transposase ISVvu4
	LC_05019	light grey		hypothetical protein												01-1_05047	light grey		hypothetical protein
	LC_05020	light grey		hypothetical protein												01-1_05048	green	pndA_2	Protein PndA
	LC_05021	blue		IS481 family transposase ISVvu4												01-1_05049	light grey		hypothetical protein
	LC_05022	light grey		DUF2913 family protein												01-1_05050	red	yenA	Tc toxin subunit A
	LC_05023	green	pndA_1	Protein PndA												01-1_05051	red	yenB	Toxin subunit YenB
	LC_05024	light grey		hypothetical protein												01-1_05052	red	rhs	RHS repeat protein,insecticidal toxin complex protein TccC3
	LC_05025	red	yenA	Tc toxin subunit A												01-1_05053	red	yenC2	Toxin subunit YenC2
	LC_05026	red	yenB	Toxin subunit YenB												01-1_05054	red	rhs	RHS repeat protein,,type IV secretion protein Rhs,insecticidal toxin complex protein TccC3
	LC_05027	red	rhs	RHS repeat protein												01-1_05055	light grey		hypothetical protein
	LC_05028	red	yenC2	Toxin subunit YenC2												01-1_05056	light grey		hypothetical protein
	LC_05029	red	rhs	RHS repeat protein												01-1_05057	light grey		DUF4158 domain-containing protein
	LC_05030	light grey		hypothetical protein												01-1_05058	green	fis_3	DNA-binding protein Fis
	LC_05031	yellow		type I restriction endonuclease subunit M												01-1_05059	yellow	lpxL_5	Lipid A biosynthesis lauroyltransferase
	LC_05032	green		lytic transglycosylase domain-containing protein												01-1_05060	yellow	rutC	Putative aminoacrylate peracid reductase RutC
	LC_05033	light grey		hypothetical protein												01-1_05061	yellow	ptcA	Putrescine carbamoyltransferase
	LC_05034	light pink		conjugative transfer relaxase/helicase TraI												01-1_05062	yellow	aguA_2	Agmatine deiminase
	LC_05035	green		Hok/Gef family protein												01-1_05063	green	gadC_2	putative glutamate/gamma-aminobutyrate antiporter
	LC_05036	light grey		hypothetical protein												01-1_05064	yellow	arcC2	Carbamate kinase 2
	LC_05037	light grey		hypothetical protein												01-1_05065	green	fabR_2	HTH-type transcriptional repressor FabR
	LC_05038	green		ANR family transcriptional regulator												01-1_05066	light grey		DUF6404 family protein
	LC_05039	green	ssb_2	Single-stranded DNA-binding protein												01-1_05067	yellow	soj_3	Chromosome-partitioning ATPase Soj
	LC_05040	light pink	traD_2	Coupling protein TraD												01-1_05068	green	soj_4	Sporulation initiation inhibitor protein Soj
	LC_05041	light grey		hypothetical protein												01-1_05069	yellow	bin3_2	Putative transposon Tn552 DNA-invertase bin3
	LC_05042	light pink		conjugal transfer protein TraG												01-1_05070	light grey		DUF3693 domain-containing protein
	LC_05043	light pink		conjugal transfer protein TraH												01-1_05071	light grey		hypothetical protein
	LC_05044	light pink		conjugal transfer protein TraF												01-1_05072	green		replication initiation factor domain-containing protein
	LC_05045	light grey		hypothetical protein												01-1_05073	light grey		hypothetical protein
	LC_05046	light grey		hypothetical protein												01-1_05074	light grey		hypothetical protein
	LC_05047	light pink		type-F conjugative transfer system pilin assembly protein TraF												01-1_05075	light grey		hypothetical protein
	LC_05048	light pink		type-F conjugative transfer system mating-pair stabilization protein TraN												01-1_05076	green		chemotaxis protein
	LC_05049	light pink		type-F conjugative transfer system pilin assembly protein TrbC												01-1_05077	light grey		DUF2523 family protein
	LC_05050	light pink		conjugal transfer pilus assembly protein TraU												01-1_05078	red		toxin
	LC_05051	light pink		type-F conjugative transfer system protein TraW												01-1_05079	light grey		hypothetical protein
	LC_05052	light grey		hypothetical protein												01-1_05080	light grey		hypothetical protein
	LC_05053	light grey		hypothetical protein												01-1_05081	green		phage protein
	LC_05054	light grey		hypothetical protein												01-1_05082	light grey		DUF4225 domain-containing protein
	LC_05055	light pink		TrbI F-type domain-containing protein												01-1_05083	green		ANR family transcriptional regulator
	LC_05056	light pink	traC_3	Protein TraC												01-1_05084	light grey		hypothetical protein
	LC_05057	light pink		type IV conjugative transfer system protein TraV												01-1_05085	green		Iron-sulfur cluster carrier protein
	LC_05058	green	gpsB	Cell cycle protein GpsB												01-1_05086	light grey		hypothetical protein
	LC_05059	light pink		type-F conjugative transfer system secretin TraK												01-1_05087	light grey		DUF4225 domain-containing protein
	LC_05060	light pink		type IV conjugative transfer system protein TraE												01-1_05088	green	hcpA_2	Major exported protein
	LC_05061	light pink		type IV conjugative transfer system protein TraL												01-1_05089	light grey		hypothetical protein
	LC_05062	light pink		type IV conjugative transfer system pilin TraA												01-1_05090	light grey		hypothetical protein
	LC_05063	light grey		hypothetical protein												01-1_05091	light grey		hypothetical protein
	LC_05064	light grey		hypothetical protein												01-1_05092	yellow		type I restriction endonuclease subunit M
	LC_05065	light grey		hypothetical protein												01-1_05093	green		lytic transglycosylase domain-containing protein
	LC_05066			No significant similarity found												01-1_05094	light grey		hypothetical protein
	LC_05067	green		helix-turn-helix transcriptional regulator												01-1_05095	light pink		conjugative transfer relaxase/helicase TraI
	LC_05068	green	prtR	HTH-type transcriptional regulator PrtR												01-1_05096	green	pndA_3	Protein PndA
	LC_05069	light grey		hypothetical protein												01-1_05097	light grey		hypothetical protein
	LC_05070	blue		Tn3 family transposase ISSba14												01-1_05098	light grey		hypothetical protein
																01-1_05099	light pink	traD_2	Coupling protein TraD
																01-1_05100	light grey		hypothetical protein
																01-1_05101	light pink		conjugal transfer protein TraG N-terminal domain-containing protein
																01-1_05102	light pink		conjugal transfer protein TraH
																01-1_05103	light pink		conjugal transfer protein TraF
																01-1_05104	light grey		hypothetical protein
																01-1_05105			No significant similarity found
																01-1_05106	light pink		type-F conjugative transfer system pilin assembly protein TraF
																01-1_05107	light pink		type-F conjugative transfer system mating-pair stabilization protein TraN
																01-1_05108	light pink		type-F conjugative transfer system pilin assembly protein TrbC
																01-1_05109	light pink		conjugal transfer pilus assembly protein TraU
																01-1_05110	light pink		type-F conjugative transfer system protein TraW
																01-1_05111	light grey		hypothetical protein
																01-1_05112	light grey		hypothetical protein
																01-1_05113	light grey		hypothetical protein
																01-1_05114	light pink		TrbI F-type domain-containing protein
																01-1_05115	light pink	traC_2	Protein TraC
																01-1_05116	light pink		type IV conjugative transfer system protein TraV
																01-1_05117	green	gpsB	Cell cycle protein GpsB
																01-1_05118	light pink		type-F conjugative transfer system secretin TraK
																01-1_05119	light pink		type IV conjugative transfer system protein TraE
																01-1_05120	light pink		type IV conjugative transfer system protein TraL
																01-1_05121	light pink		type IV conjugative transfer system pilin TraA
																01-1_05122	light grey		hypothetical protein
																01-1_05123	light grey		hypothetical protein
																01-1_05124	light grey		hypothetical protein
																01-1_05125			No significant similarity found
																01-1_05126	green		helix-turn-helix transcriptional regulator
																01-1_05127	green	prtR	HTH-type transcriptional regulator PrtR
																01-1_05128	light grey		hypothetical protein
																01-1_05129	blue	rpnA_2	Recombination-promoting nuclease RpnA
